# Supplementary material
Source: HighWire-hosted journal article supplement (http://dmd.aspetjournals.org/highwire/filestream/72034/field_highwire_adjunct_files/0/Supplemental_82495.pdf)
Supplement: Supplemental_82495.pdf [file Supplemental_82495.pdf]

## Supplemental Data

### Oligomerization and catalytic parameters of human UDP-glucuronosyltransferase 1A10: Expression and characterization of the recombinant protein

Kyungbo Kim, Fang Zheng, and Chang-Guo Zhan

Molecular Modeling and Biopharmaceutical Center and Department of Pharmaceutical Sciences, College of Pharmacy, University of Kentucky, 789 South Limestone Street, Lexington, KY 40536

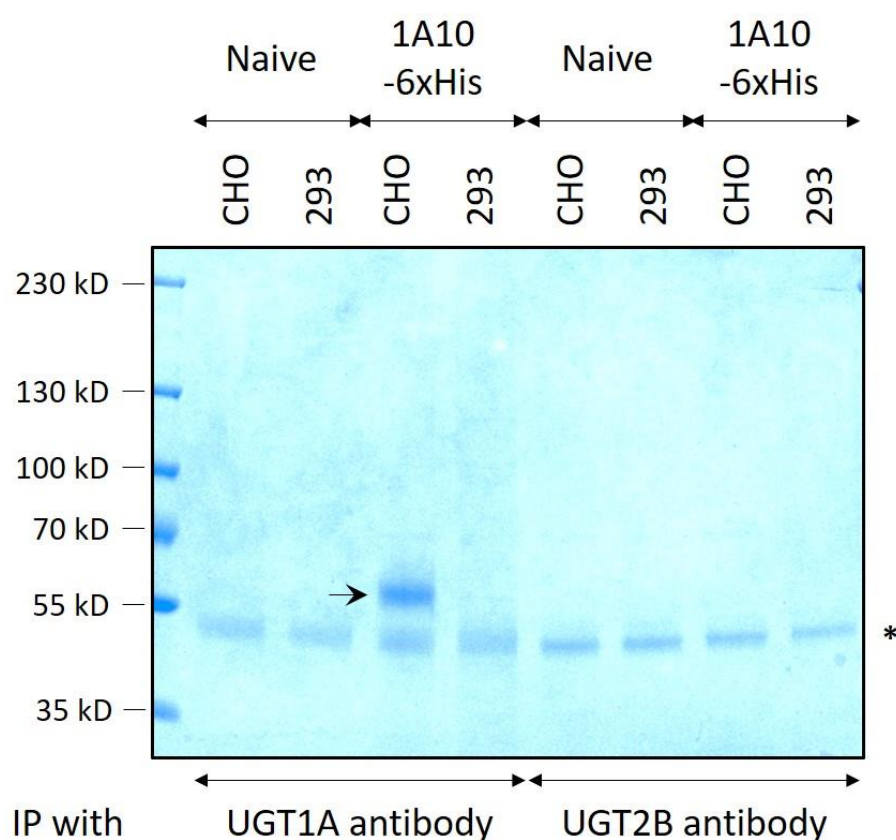

**Supplemental Figure 1.** Immunoprecipitation assay for UGT1A10-6xHis. Membrane-bound UGT1A10-6xHis protein was first extracted with 1.5% Triton X-100, followed by anti-UGT1A immunoprecipitation. Precipitated UGT1A10-6xHis was revealed by coomassie blue staining (see arrow). Asterisk marks the heavy chain of the immunoglobulin and this was used as an internal loading control.

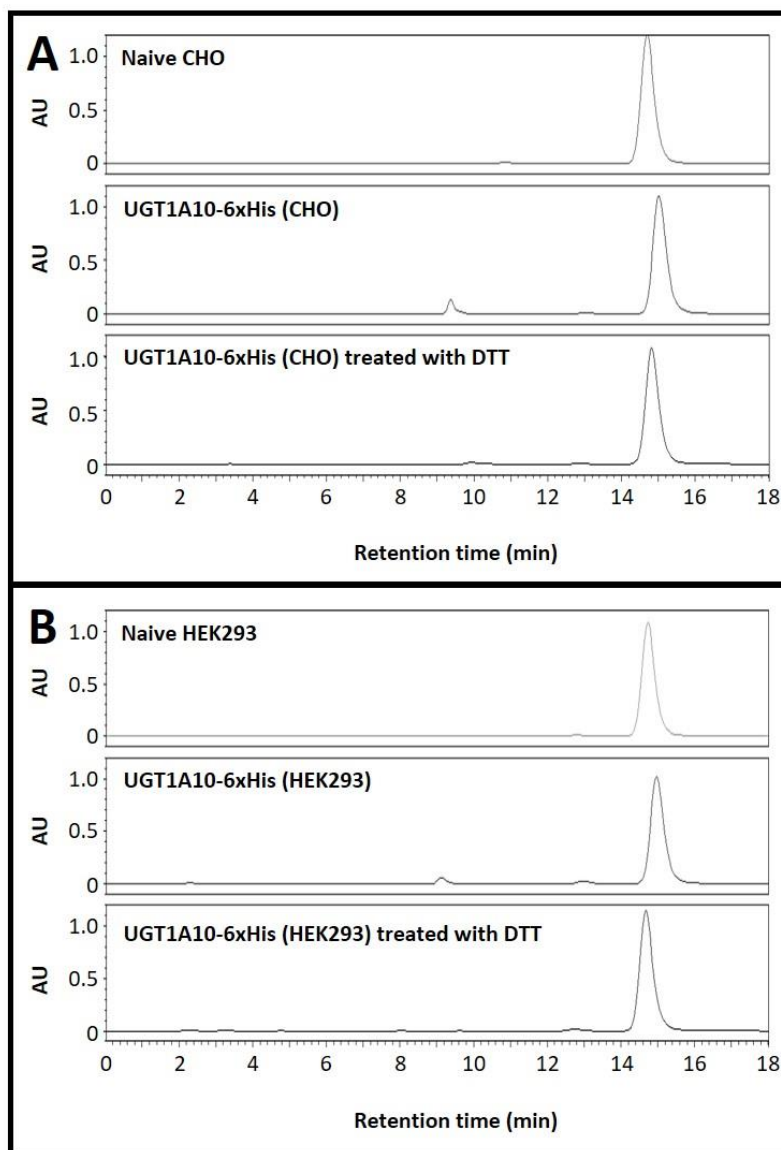

**Supplemental Figure 2.** HPLC analysis of the formation of entacapone 3-*O*-glucuronide using microsomes prepared from UGT1A10-6xHis-overexpressing stable cell lines. Retention time was found to be about 9.4 min and 15 min for entacapone 3-*O*-glucuronide and entacapone. (A) Top, microsomal proteins prepared from naïve CHO cells; middle, membrane-bound UGT1A10-6xHis expressed in CHO cells; bottom, membrane-bound UGT1A10-6xHis expressed in CHO cells was incubated with 100 mM DTT for 1 h prior to glucuronidation activity assay. (B) Top, microsomal proteins prepared from naïve HEK293 cells; middle, membrane-bound UGT1A10-6xHis expressed in HEK293 cells; bottom, membrane-bound UGT1A10-6xHis expressed in HEK293 cells was incubated with 100 mM DTT for 1 h prior to glucuronidation activity assay.

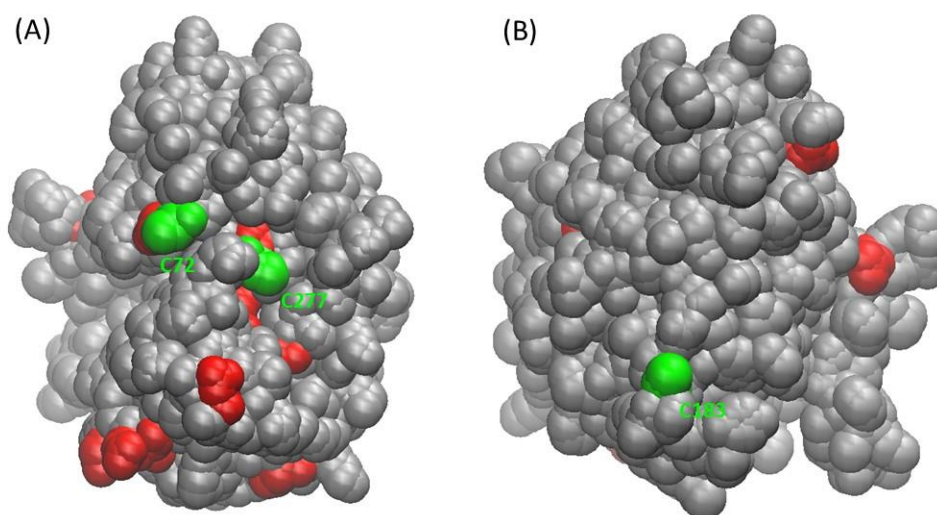

**Supplemental Figure 3.** The modeled van der Waals surface of the UGT1A10 protein structure, showing three solvent-accessible cysteine residues (C72, C183, and C277 in green color). Panels A and B show two sides of the protein, with C72 and C277 on one side and C183 on the opposite side. Indicated in red color are solvent-accessible asparagine residues (potential glycosylation sites). C72 and C277 are close to the entrance of the enzyme active-site pocket. C72 or C277 of a UGT1A10 molecule may form a disulfide bond with C183 or C72 or C277 of another UGT1A10 molecule for crosslinking *via* intermolecular disulfide bonds. The crosslinking disulfide bonds involving C72 or C277 are expected to block the entrance of the enzyme active-site pocket and, thus, decrease the catalytic activity of the enzyme.
